# Supplementary material for: Synthesis of 2-[2-(tert-butoxycarbonyl)-3-(acyl)guanidino]ethylamine salts for convergent introduction of acyl guanidines
Source: Royal Society of Chemistry journal article supplement (doi:10.1039/d2nj01510b), 2022-01-01
Supplement: d2nj01510b1.pdf [file d2nj01510b1.pdf]

## Electronic Supporting Information

# Synthesis of 2-[2-(*tert*-Butoxycarbonyl)-3-(acyl)guanidino]ethylamine Salts for Convergent Introduction of Acyl Guanidines

Gareth E. Boer,<sup>a</sup> Shane M. Hickey,<sup>b</sup> Alysha G. Elliott<sup>c</sup> Frederick M. Pfeffer<sup>\*a</sup>

<sup>a</sup>School of Life and Environmental Sciences, Deakin University, Waurn Ponds, Victoria, 3216, Australia

<sup>b</sup>Clinical and Health Sciences, University of South Australia, Adelaide, SA, 5000, Australia

<sup>c</sup>Centre for Superbug Solutions, Institute for Molecular Bioscience, The University of Queensland, Brisbane, Queensland, 4072, Australia

## Contents

|                                                                            |       |
|----------------------------------------------------------------------------|-------|
| S1: <sup>1</sup> H and <sup>13</sup> C NMR spectra of key compounds:       | p2–19 |
| S2: <sup>1</sup> H NMR spectra showing aminoethylguanidine cyclization:    | p20   |
| S3: <sup>1</sup> H NMR spectra showing degradation of HCl salt <b>6c</b> : | p21   |
| S4: Antibacterial activity table:                                          | p22   |

**S1:  $^1\text{H}$  NMR and  $^{13}\text{C}$  NMR spectra of key compounds:**

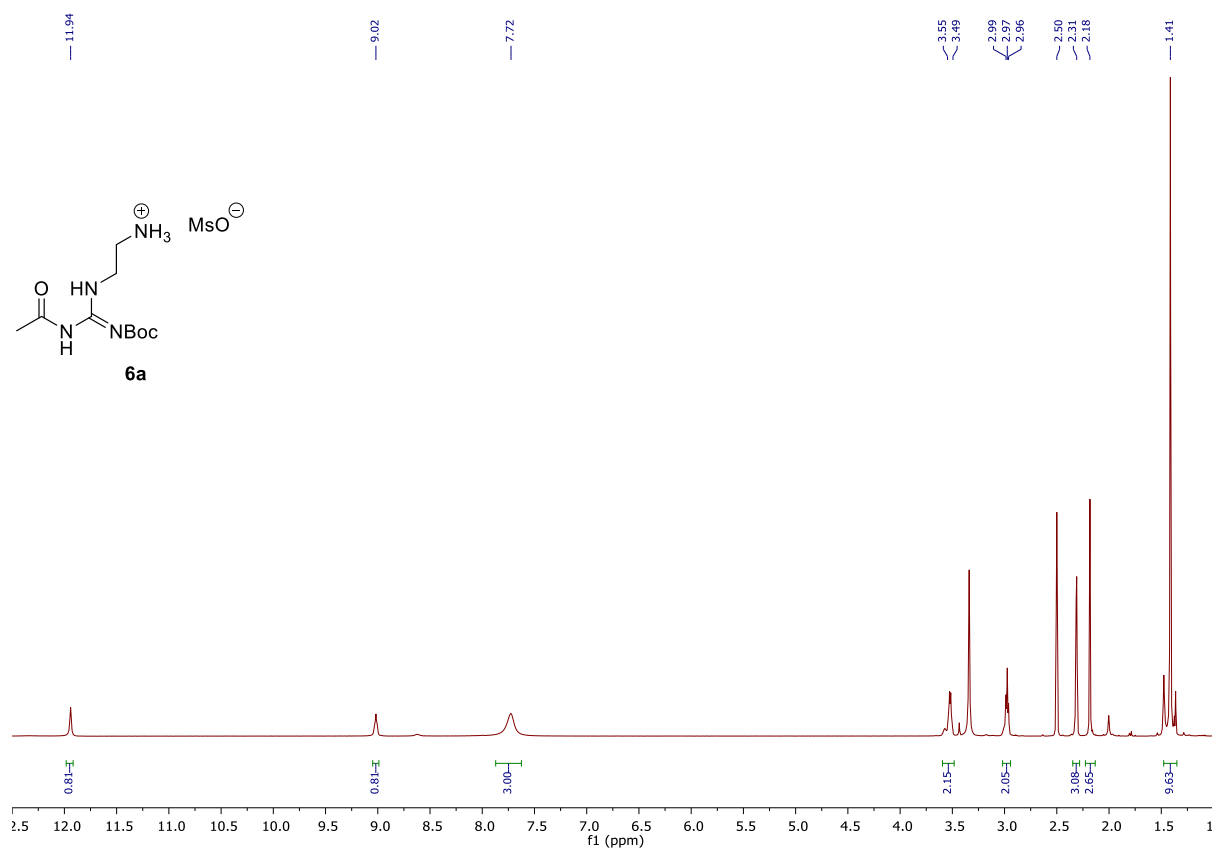

**Figure S1:**  $^1\text{H}$  NMR (400 MHz) spectrum of compound **6a** in  $\text{DMSO-}d_6$ .

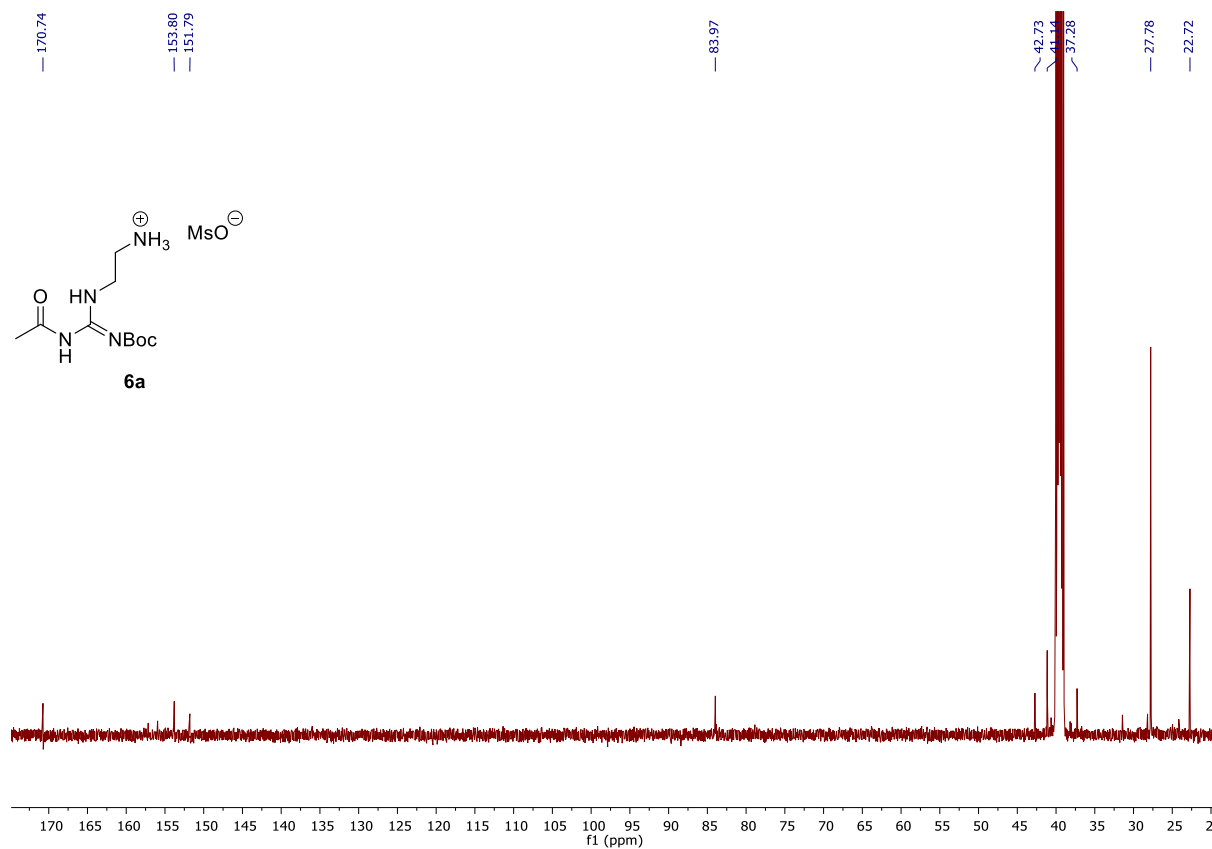

**Figure S2:**  $^{13}\text{C}$  NMR (100 MHz) spectrum of compound **6a** in  $\text{DMSO-}d_6$ .

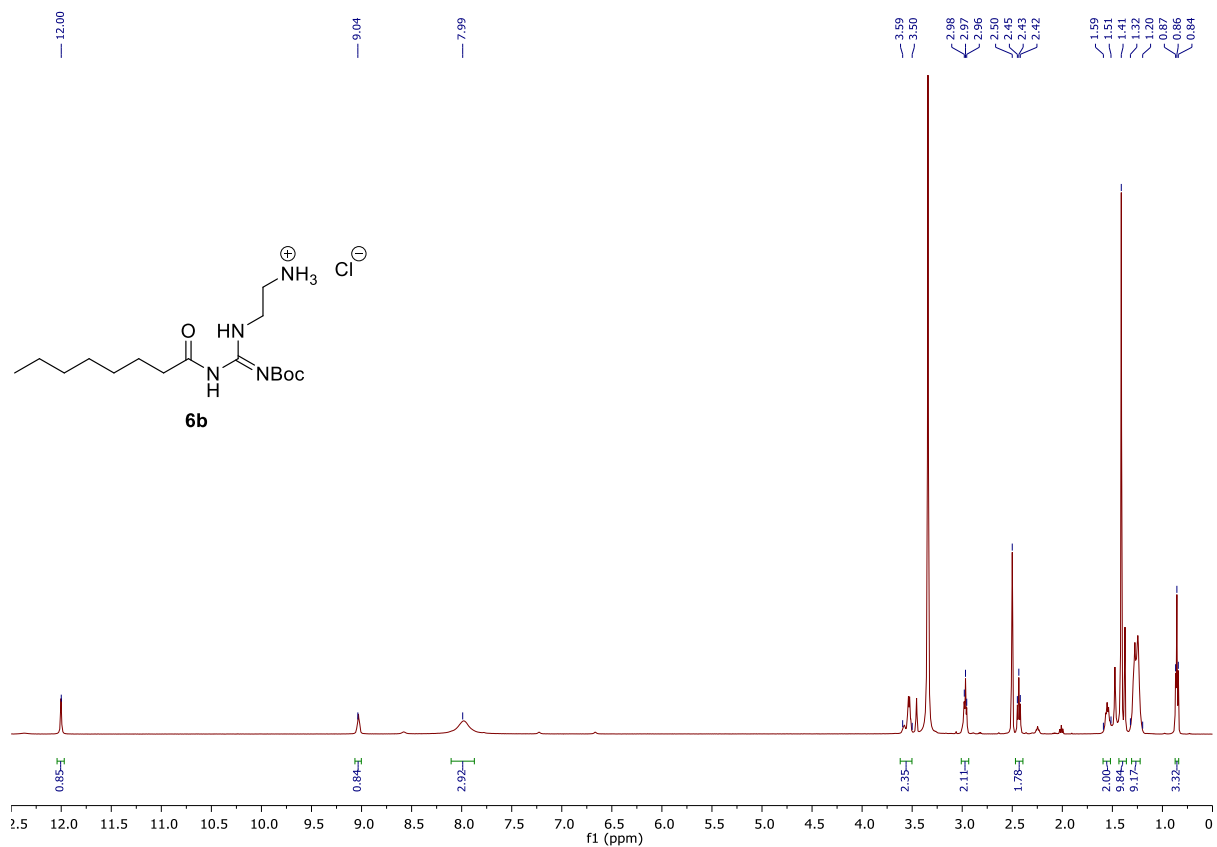

**Figure S3:**  $^1H$  NMR (500 MHz) spectrum of compound **6b** in  $DMSO-d_6$ .

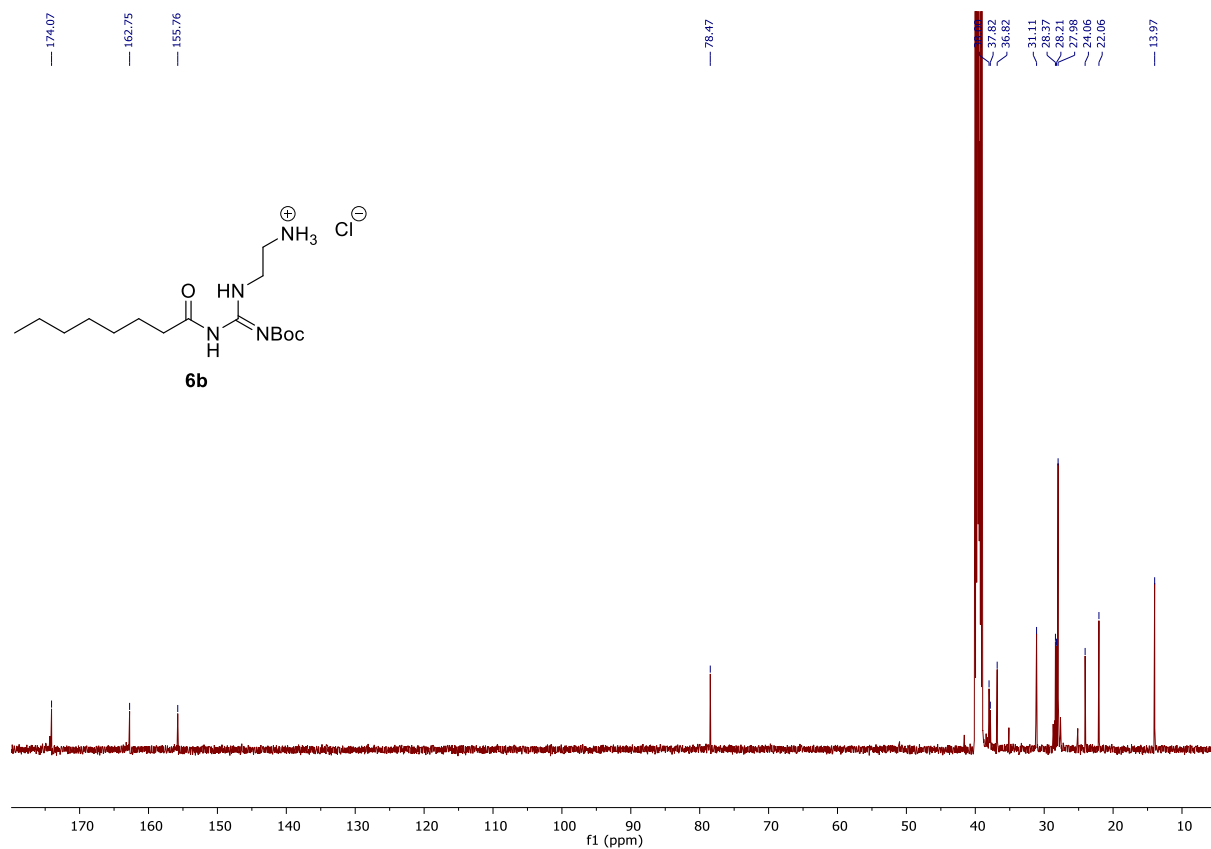

**Figure S4:** <sup>13</sup>C NMR (125 MHz) spectrum of compound **6b** in DMSO-*d*<sub>6</sub>.

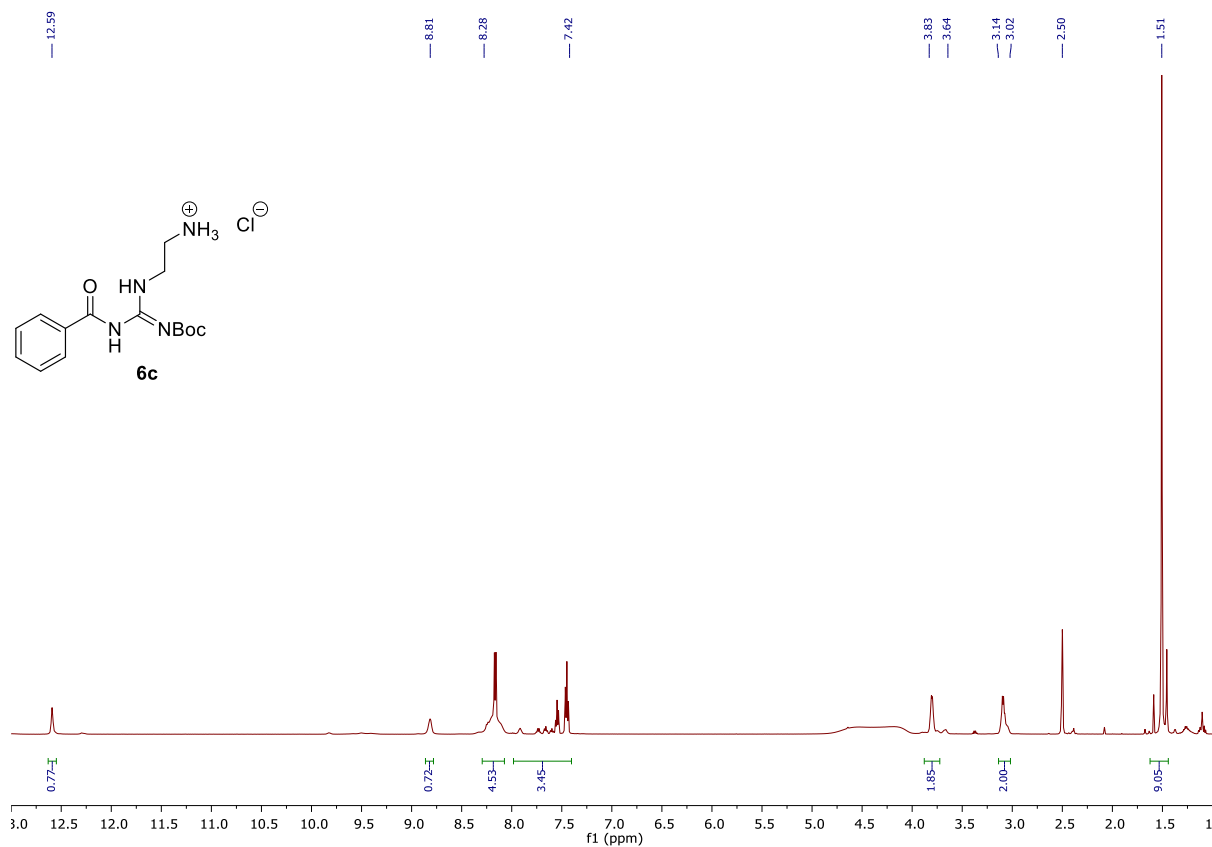

**Figure S5:**  $^1\text{H}$  NMR (400 MHz) spectrum of compound **6c** in  $\text{DMSO-}d_6$ .

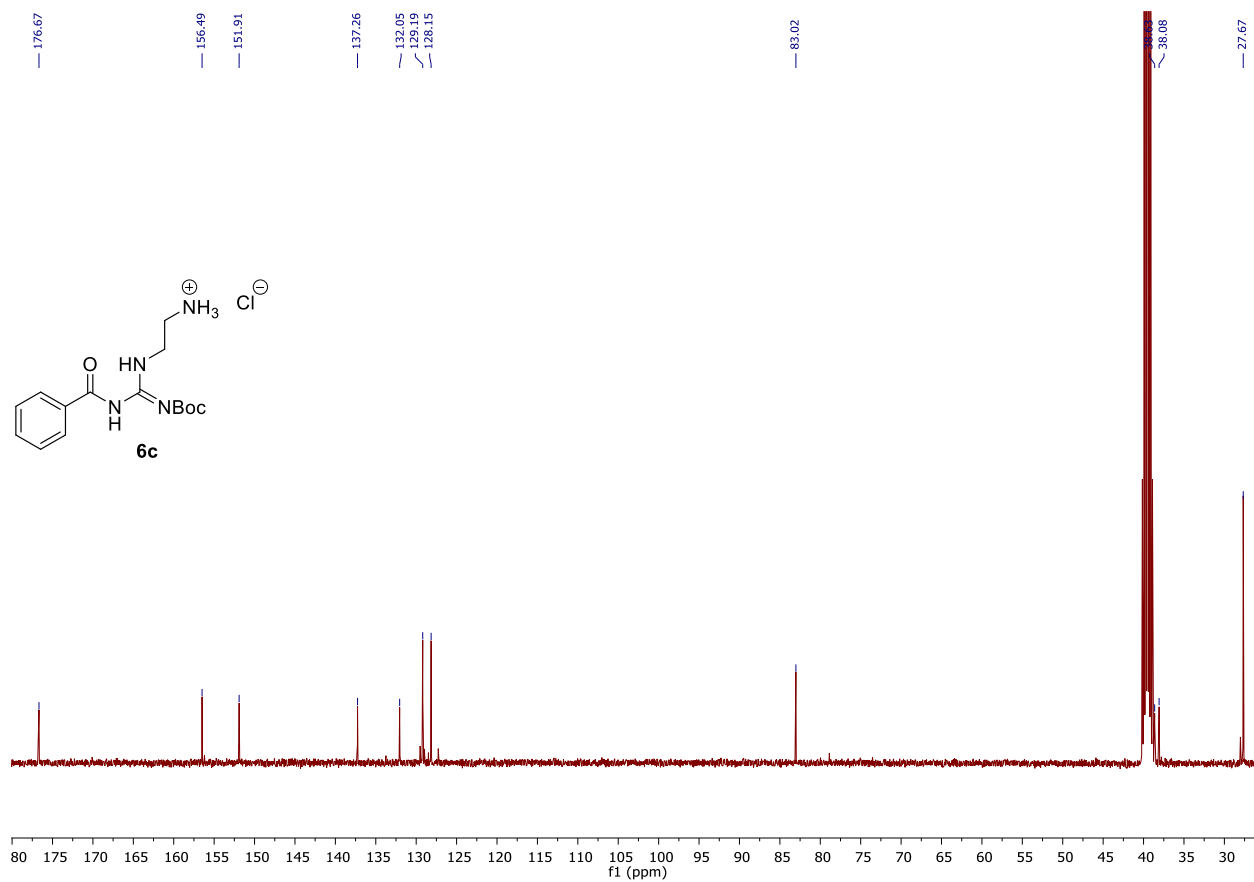

**Figure S6:** <sup>13</sup>C NMR (100 MHz) spectrum of compound **6c** in DMSO-*d*<sub>6</sub>.

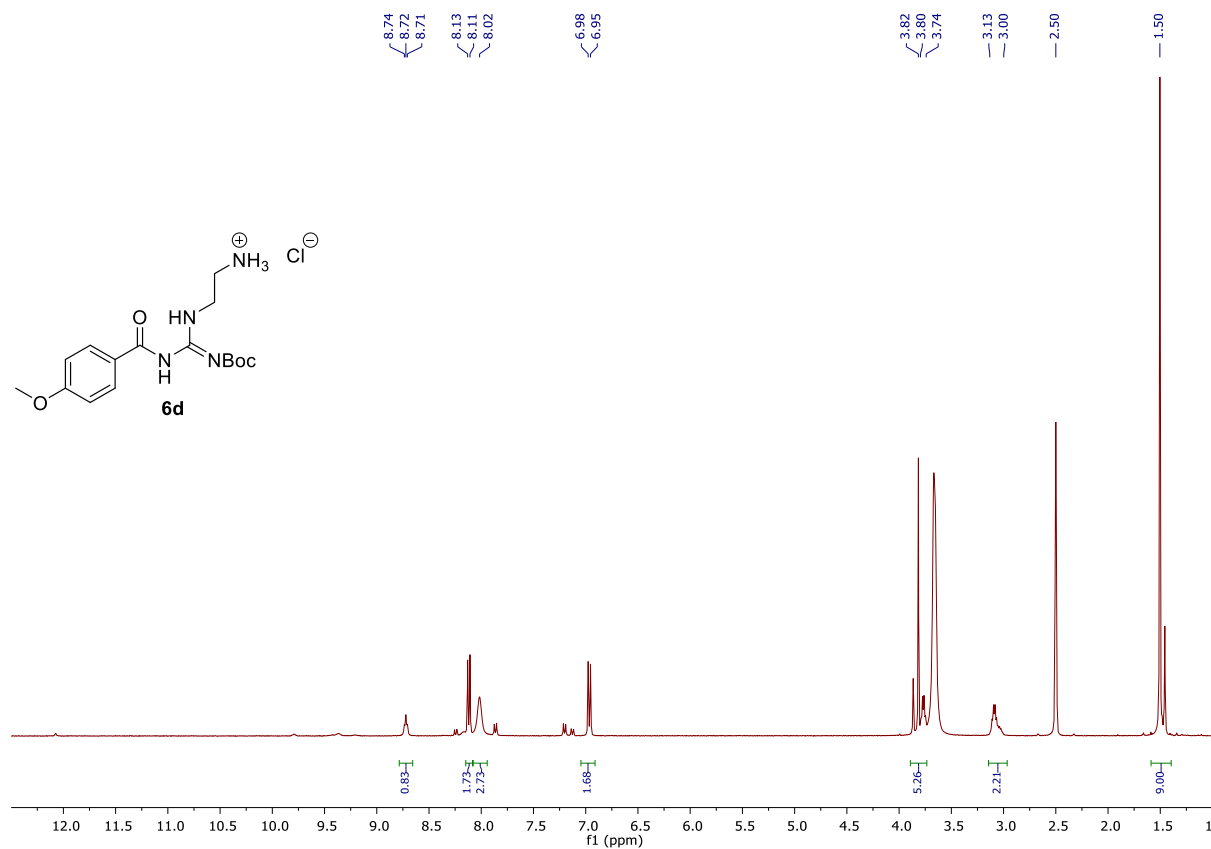

**Figure S7:** <sup>1</sup>H NMR (400 MHz) spectrum of compound **6d** in DMSO-*d*<sub>6</sub>.



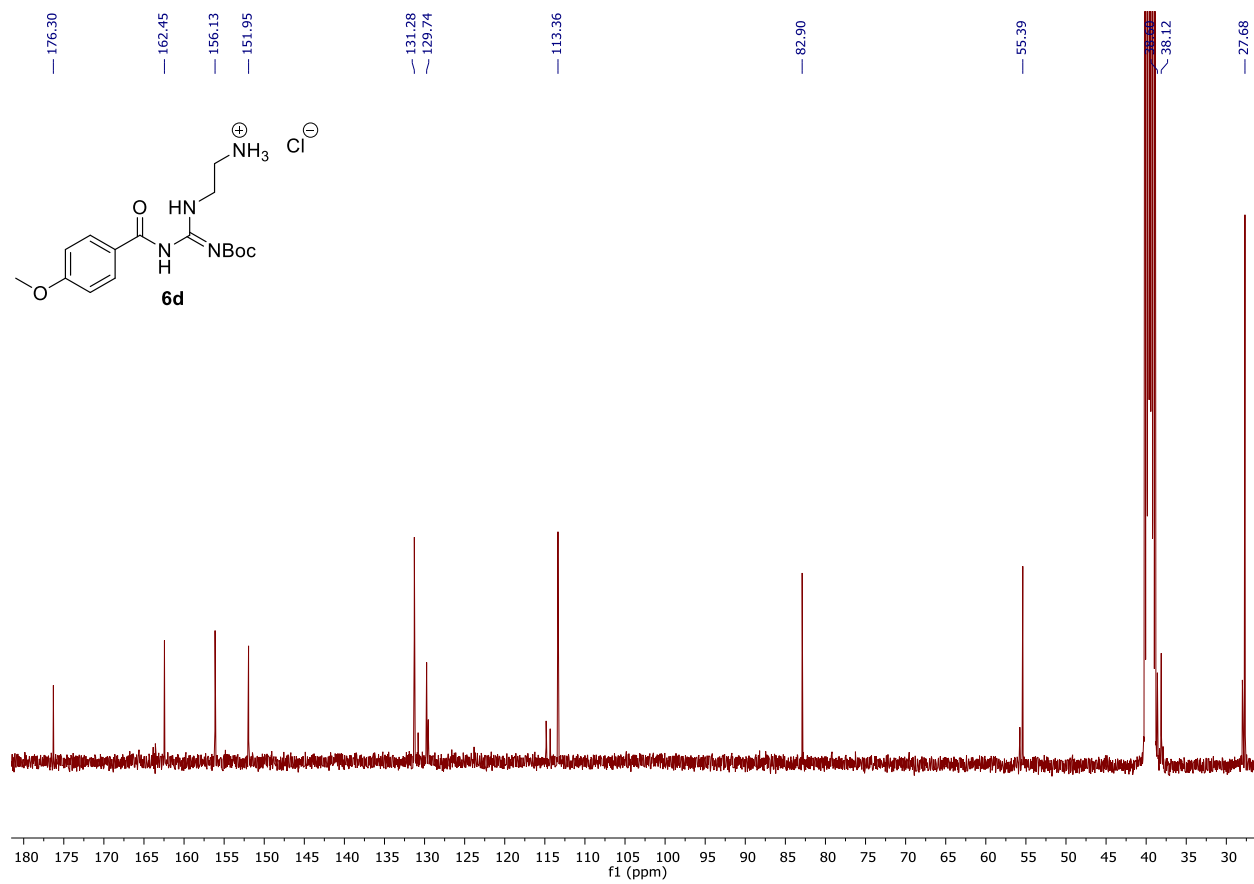

**Figure S8:** <sup>13</sup>C NMR (100 MHz) spectrum of compound **6d** in DMSO-*d*<sub>6</sub>.

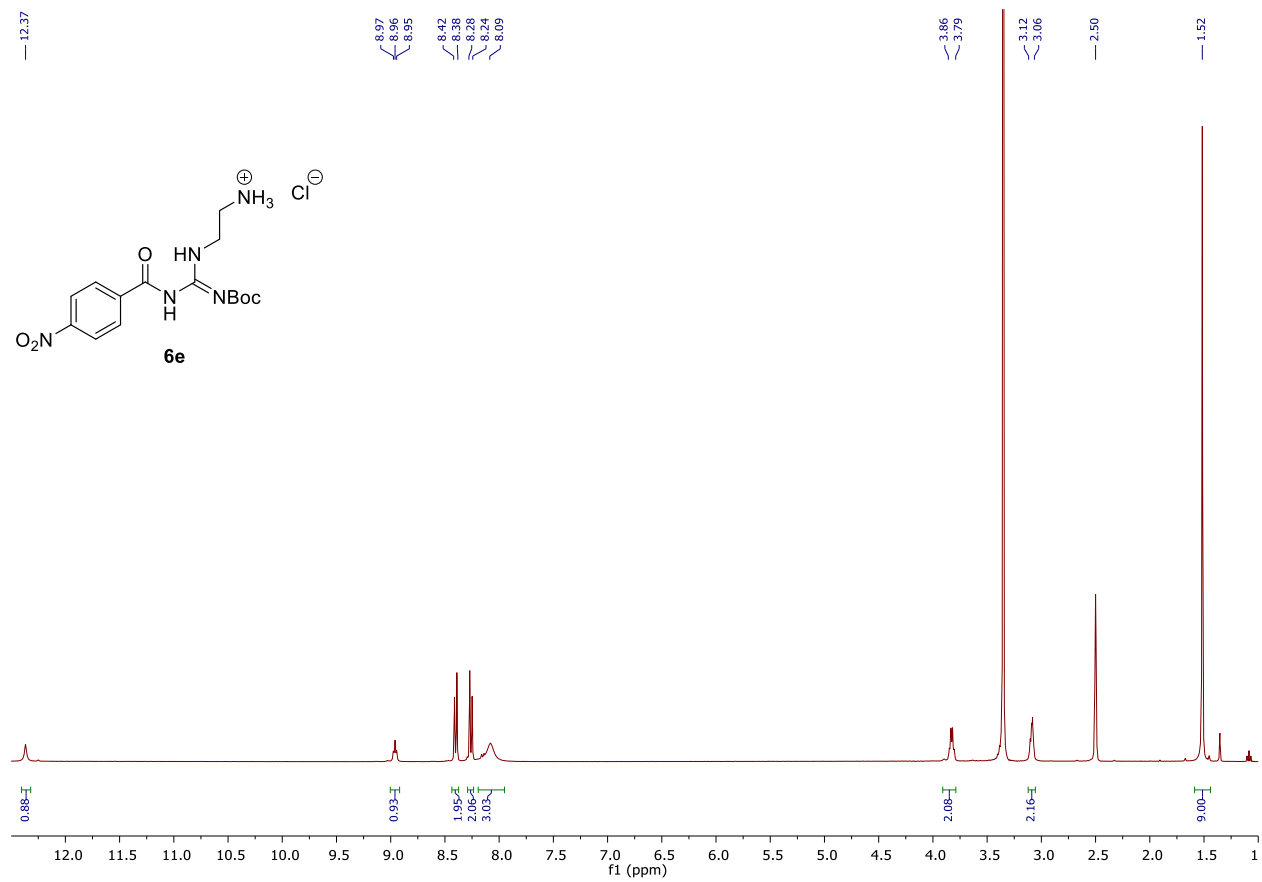

**Figure S9:**  $^1\text{H NMR}$  (400 MHz) spectrum of compound **6e** in  $\text{DMSO-}d_6$ .

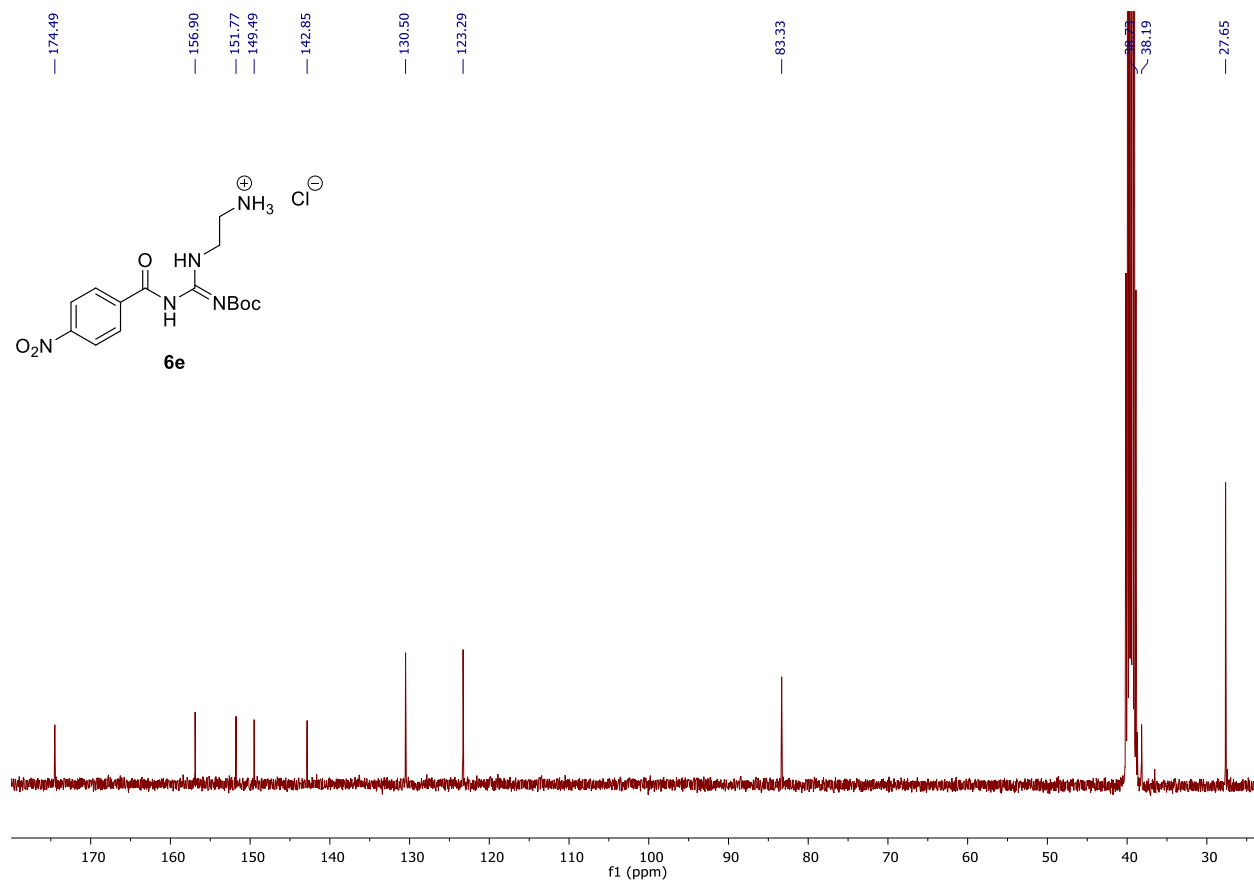

**Figure S10:** <sup>13</sup>C NMR (100 MHz) spectrum of compound **6e** in DMSO-*d*<sub>6</sub>.

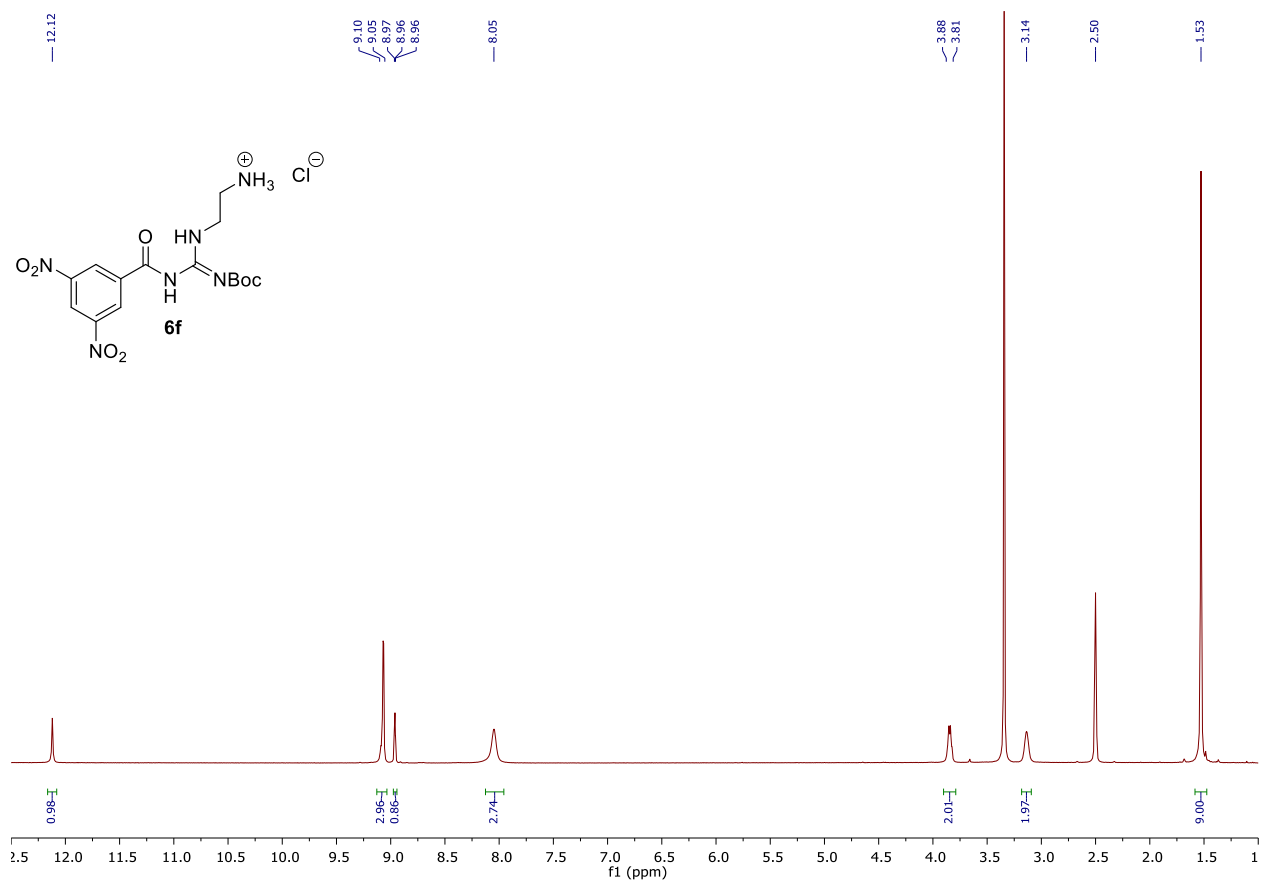

**Figure S11:** <sup>1</sup>H NMR (400 MHz) spectrum of compound **6f** in DMSO-*d*<sub>6</sub>.

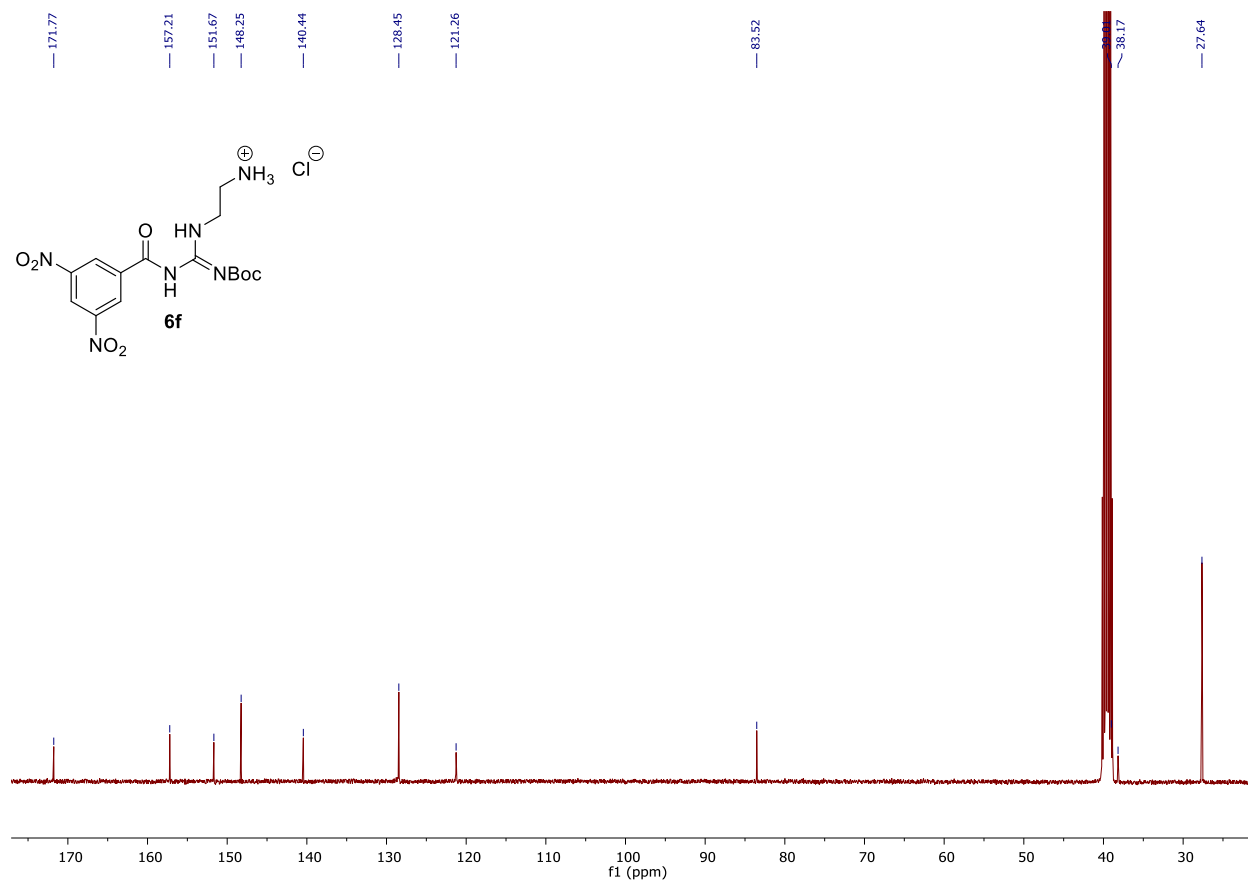

**Figure S12:** <sup>13</sup>C NMR (100 MHz) spectrum of compound **6f** in DMSO-*d*<sub>6</sub>.

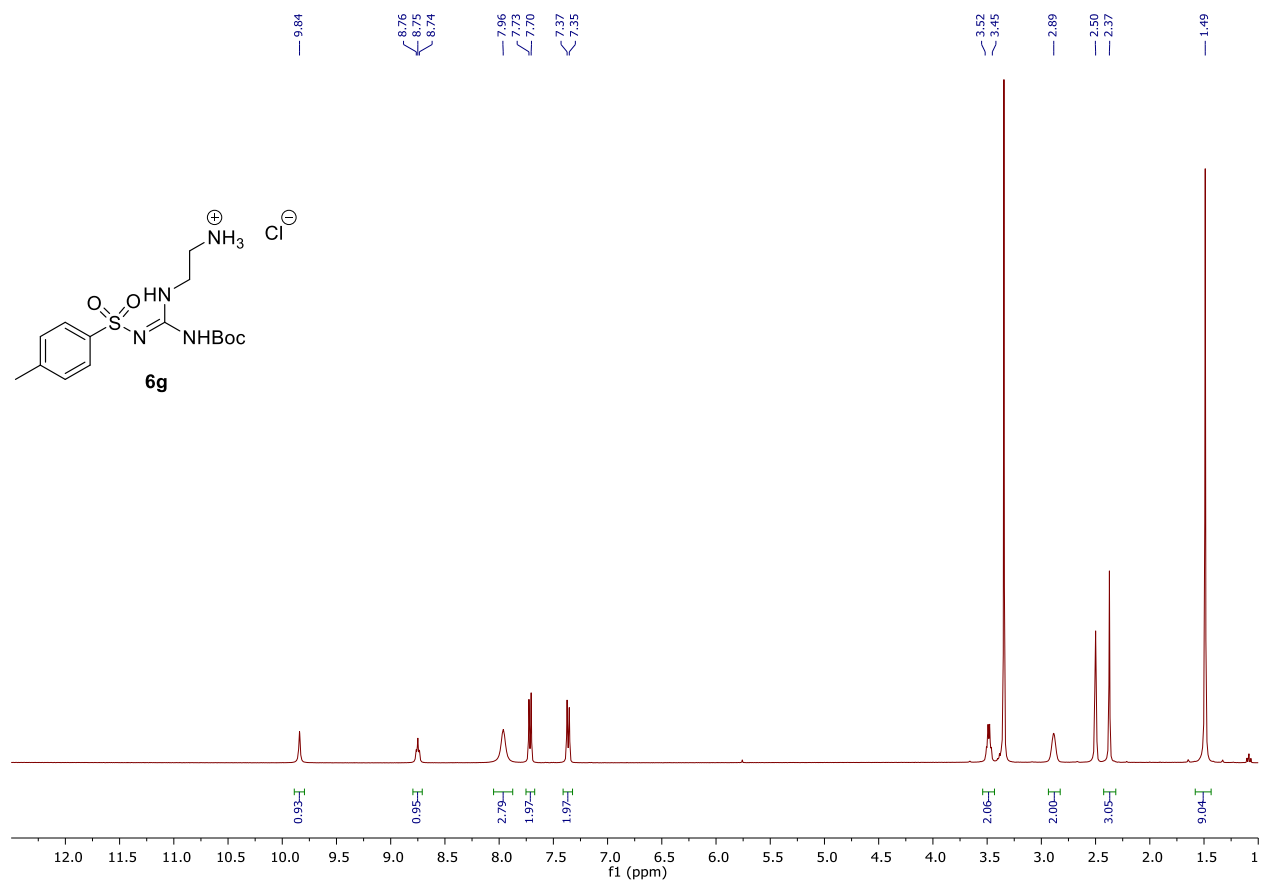

**Figure S13:**  $^1\text{H}$  NMR (400 MHz) spectrum of compound **6g** in  $\text{DMSO-}d_6$ .

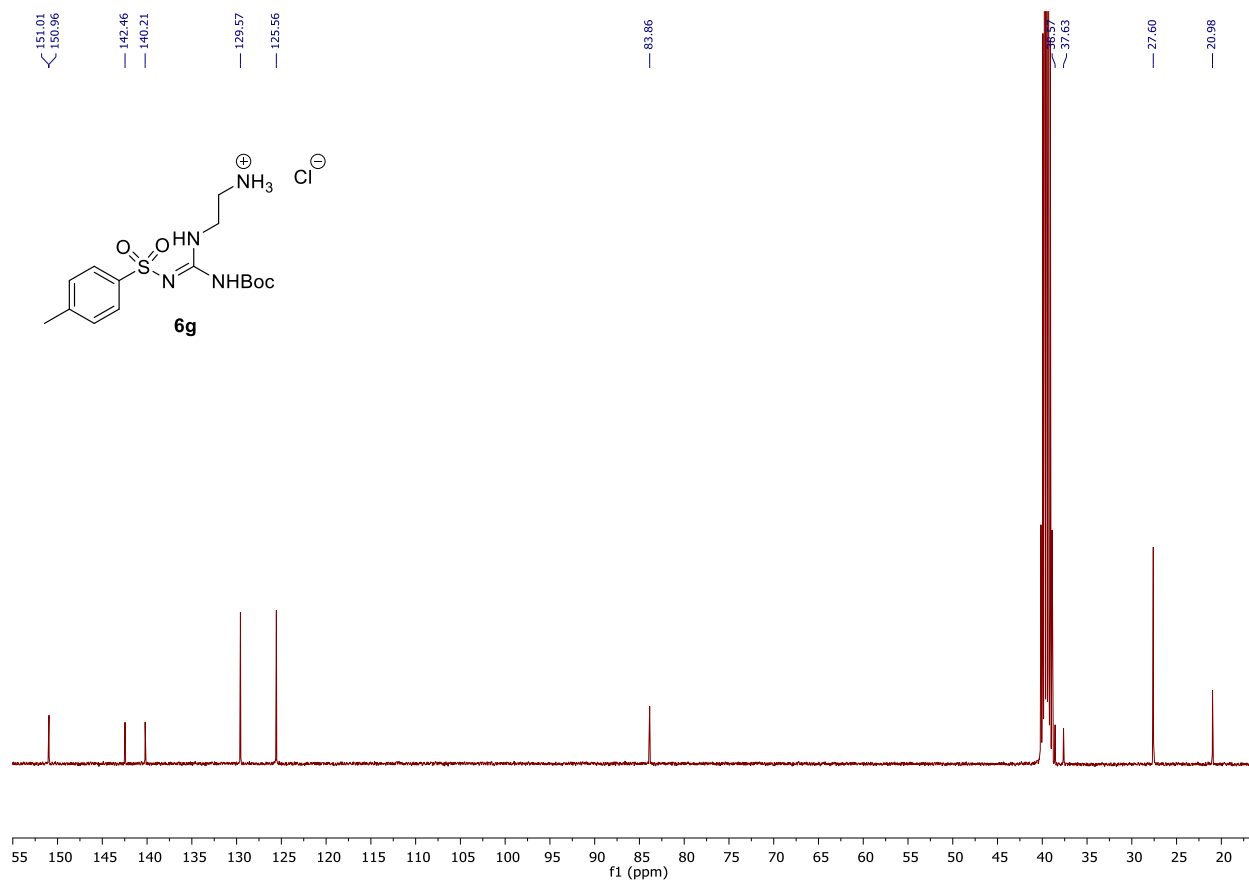

**Figure S14:** <sup>13</sup>C NMR (100 MHz) spectrum of compound **6g** in DMSO-*d*<sub>6</sub>.

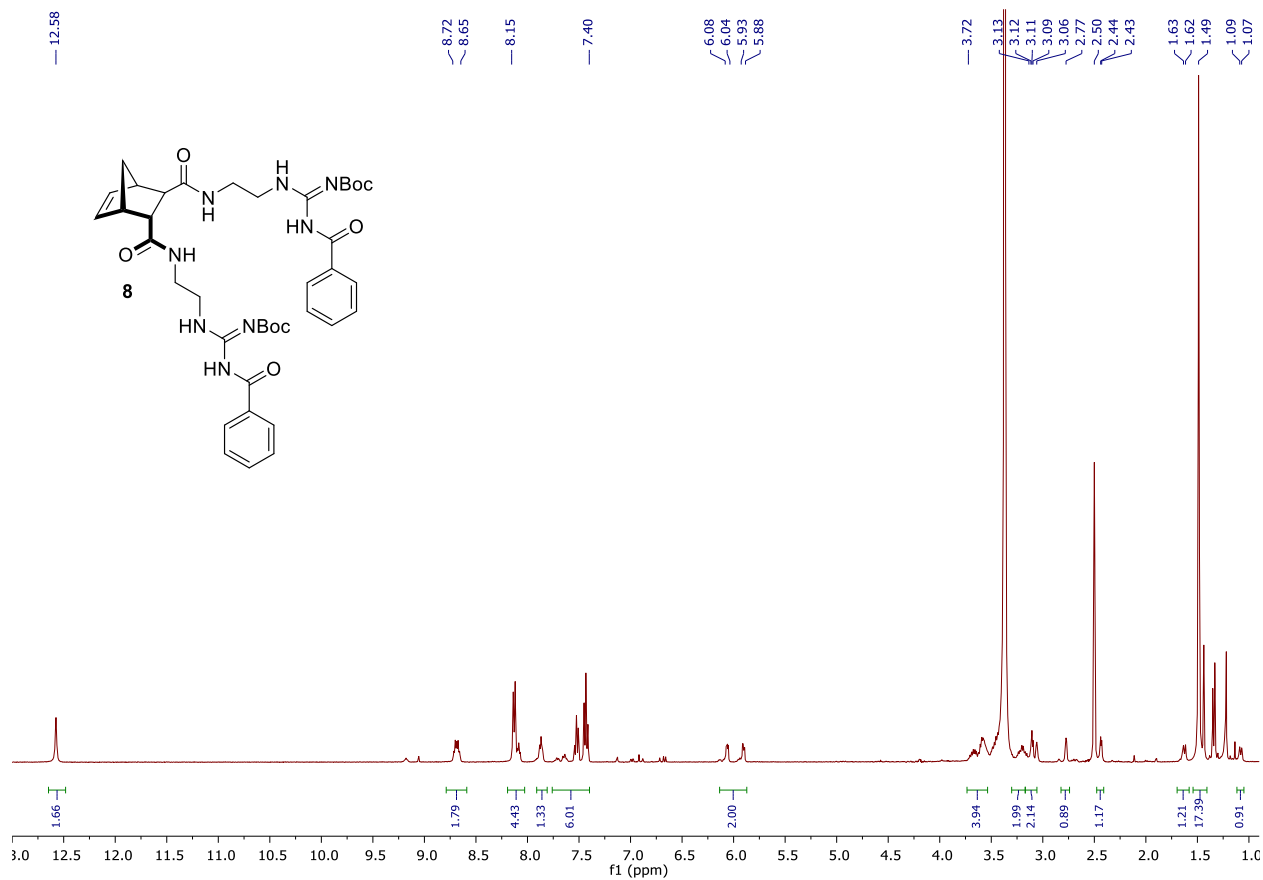

**Figure S15:** <sup>1</sup>H NMR (400 MHz) spectrum of compound **8** in DMSO-*d*<sub>6</sub>.



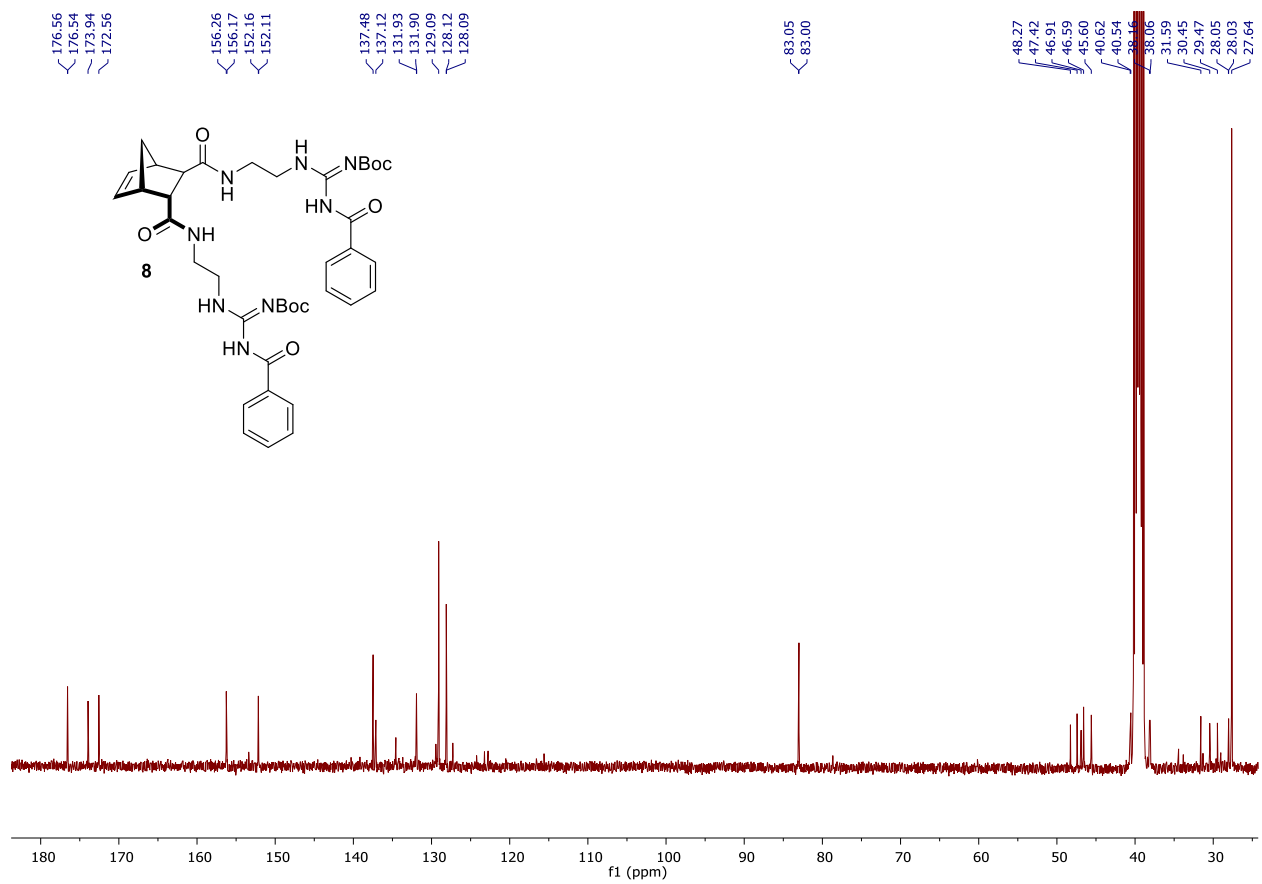

**Figure S16:**  $^{13}\text{C}$  NMR (100 MHz) spectrum of compound **8** in  $\text{DMSO-}d_6$ .

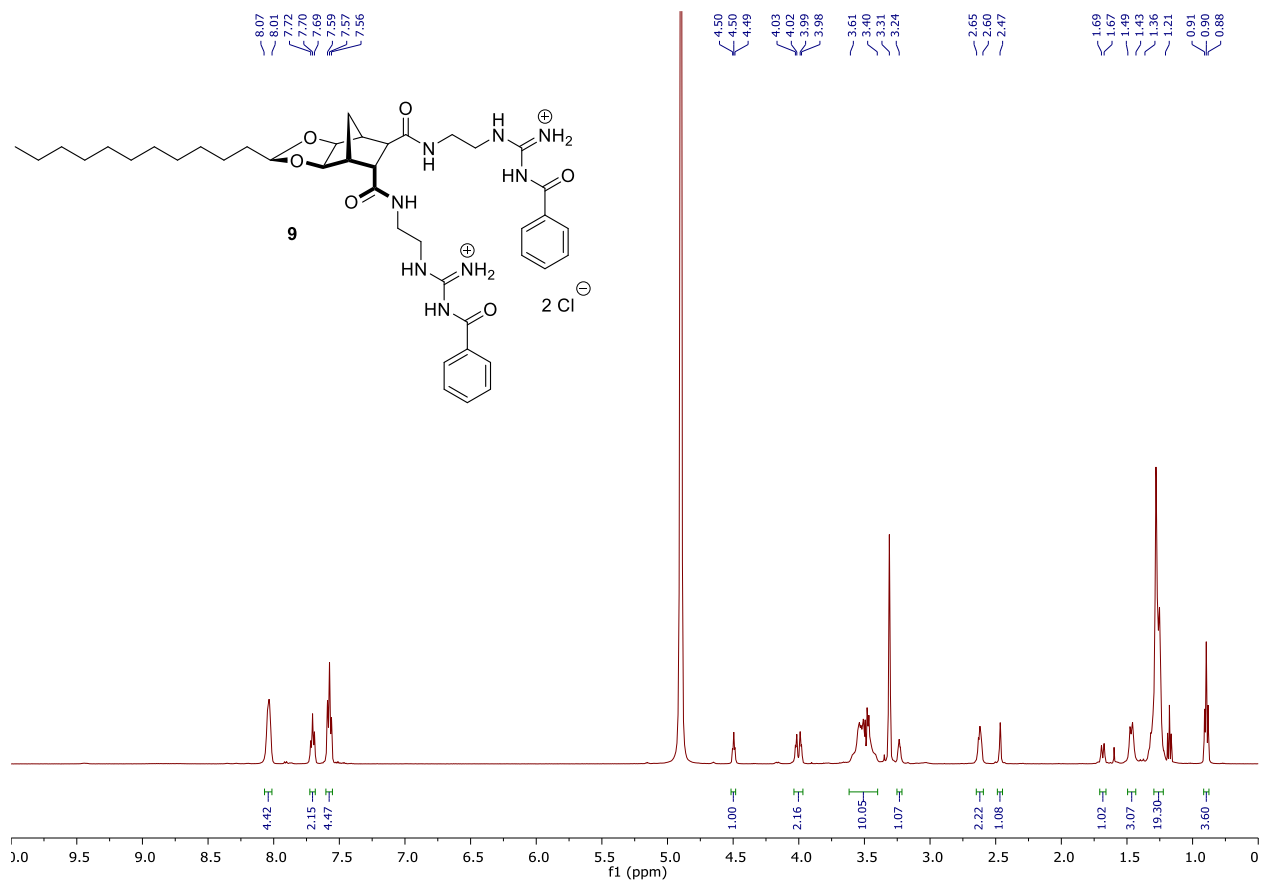

**Figure S17:**  $^1\text{H}$  NMR (400 MHz) spectrum of compound **9** in  $\text{CD}_3\text{OD}$ .

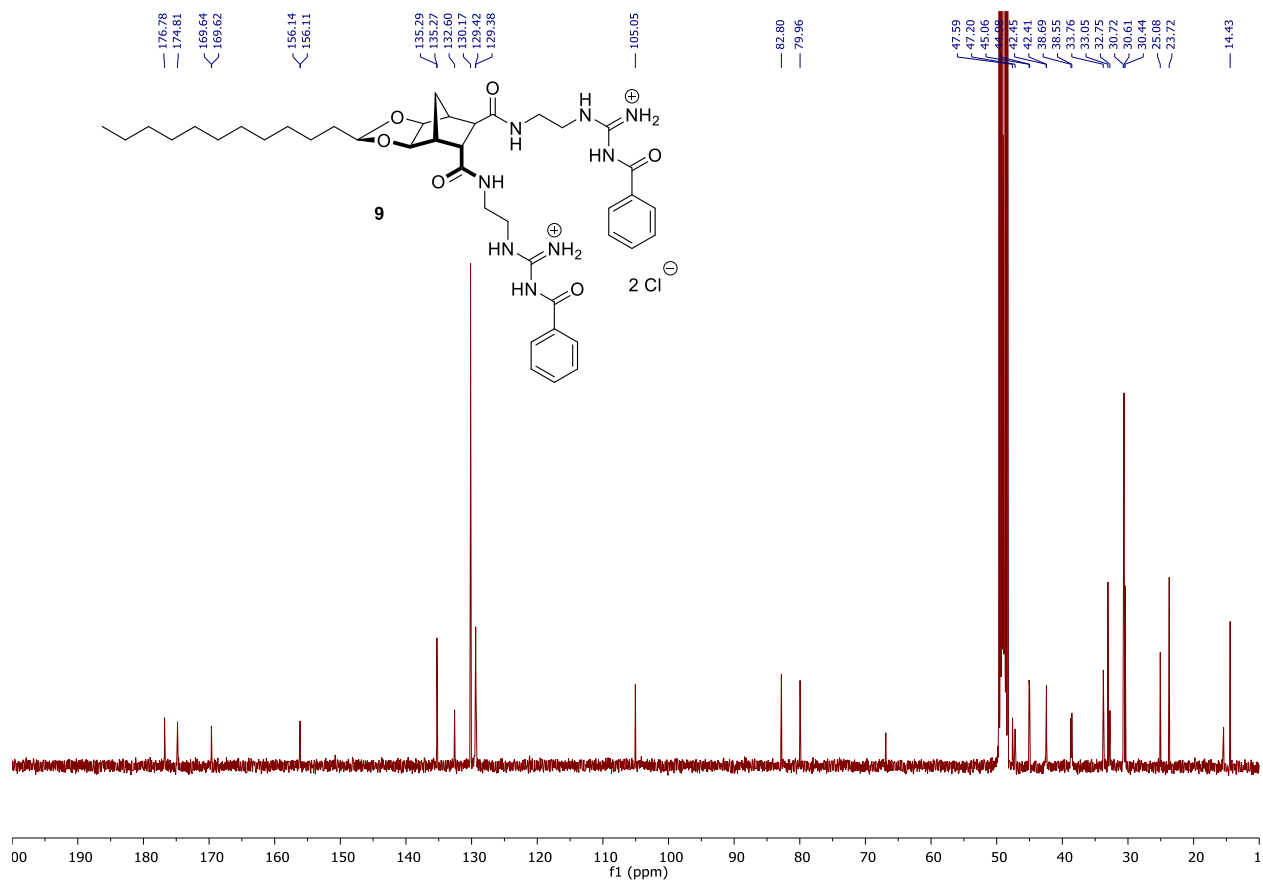

**Figure S18:**  $^{13}\text{C}$  NMR (100 MHz) spectrum of compound **9** in  $\text{CD}_3\text{OD}$ .

## S2: $^1\text{H}$ NMR spectra showing aminoethylguanidine cyclization

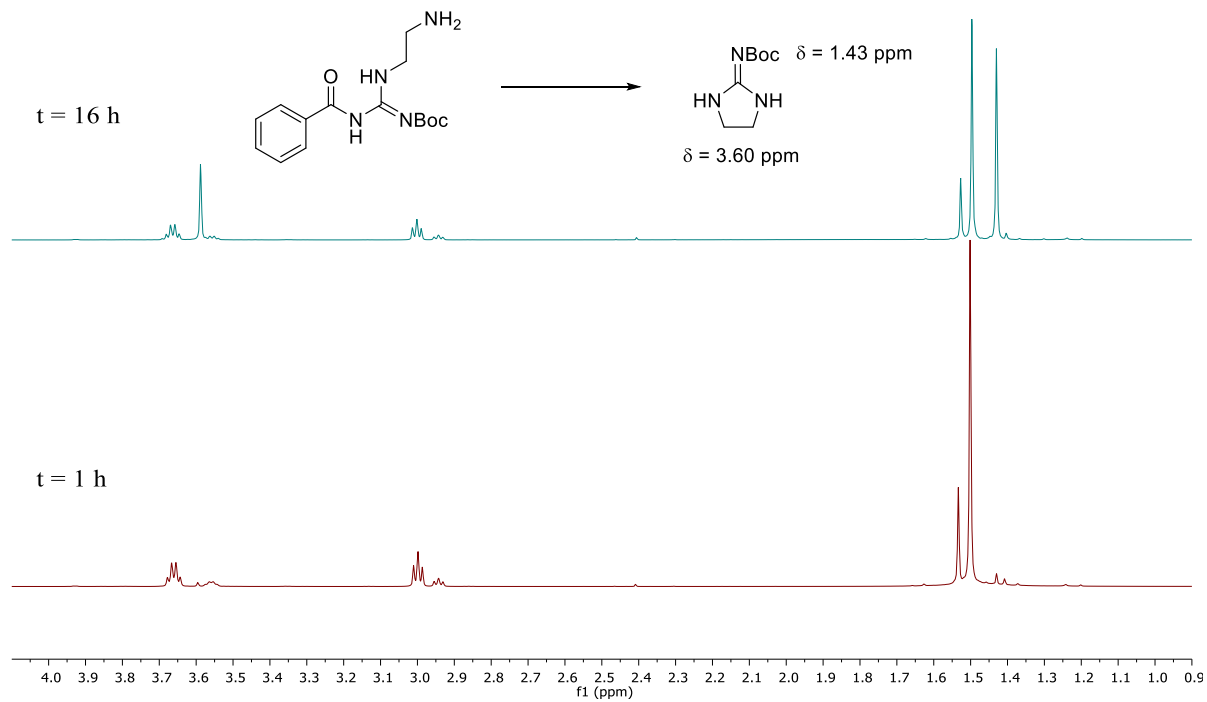

**Figure S19:**  $^1\text{H}$  NMR (400 MHz) spectra of aminoethylguanidine cyclization (see inset) at 1 and 16h timepoints post-reaction. Spectra recorded in  $\text{CDCl}_3$ .

### S3: <sup>1</sup>H NMR spectra showing degradation of HCl salt **6c**

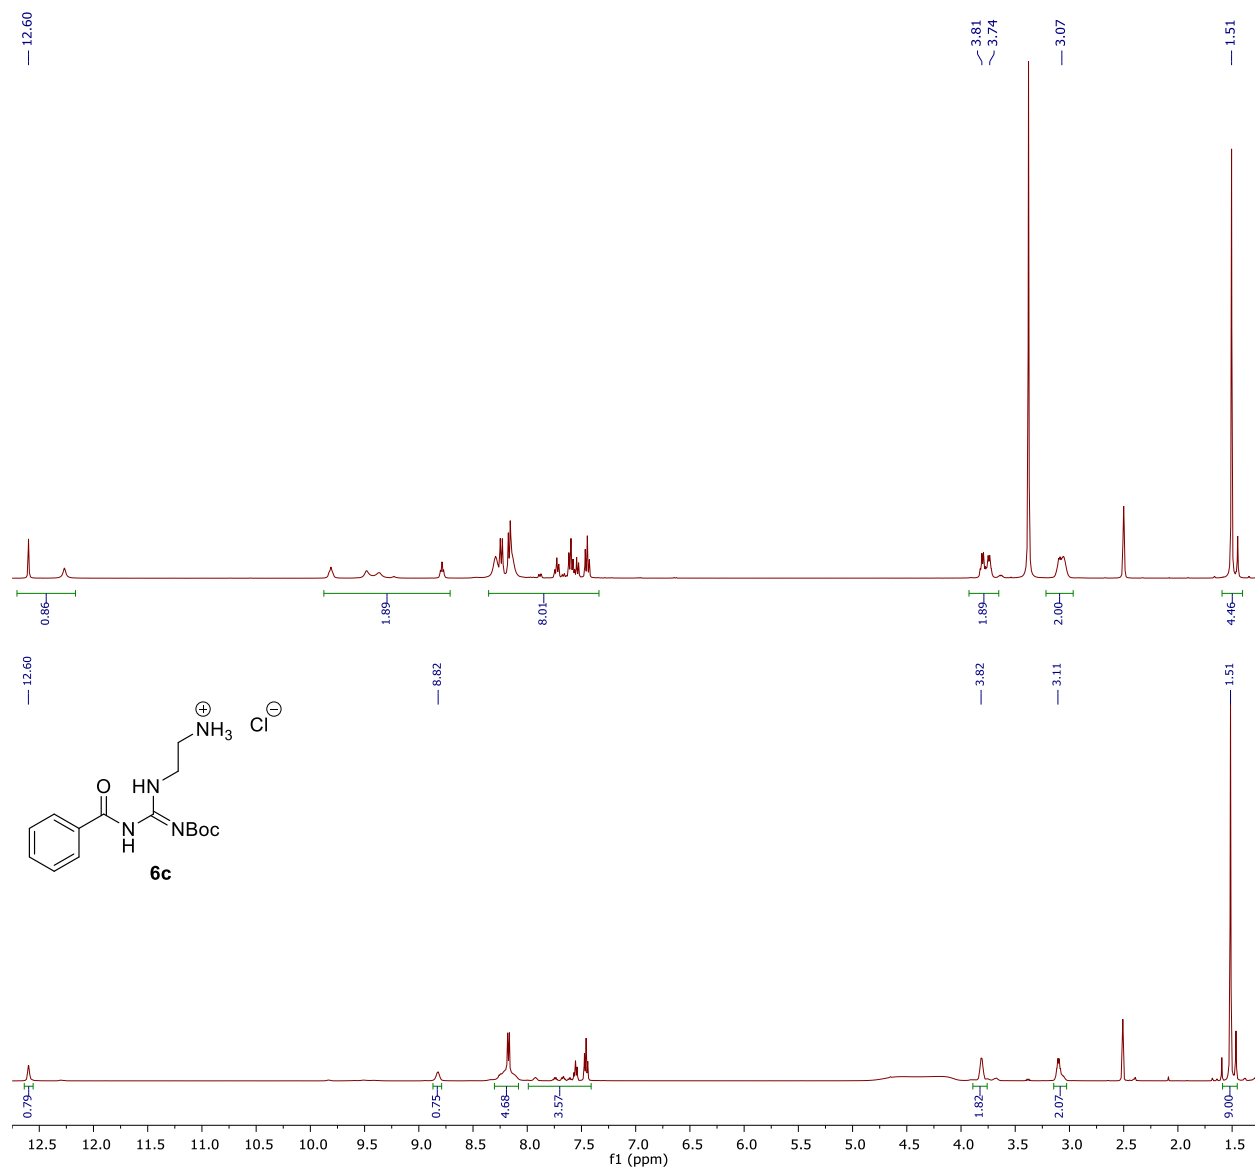

**Figure S20:** <sup>1</sup>H NMR (400 MHz) spectra of compound **6c**; *Top*: after 2 months. *Bottom*: freshly synthesised. Both spectra recorded in DMSO-*d*<sub>6</sub>.

#### S4: Antibacterial activity table

**Table S1:** Antimicrobial assay by broth microdilution minimum inhibitory concentration (MIC, µg/mL) assay.

| compound          | <i>Staphylococcus aureus</i>                  | <i>Staphylococcus aureus</i>                    | <i>Staphylococcus aureus</i> | <i>Staphylococcus aureus</i>                 | <i>Streptococcus pneumoniae</i> |
|-------------------|-----------------------------------------------|-------------------------------------------------|------------------------------|----------------------------------------------|---------------------------------|
|                   | ATCC 43300                                    | NRS 17                                          | ATCC 700699 (NRS 1)          | VRS 10                                       | ATCC 700677                     |
|                   | methicillin resistant <i>S. aureus</i> (MRSA) | vancomycin intermediate <i>S. aureus</i> (VISA) | MRSA/VISA                    | vancomycin resistant <i>S. aureus</i> (VRSA) | multidrug resistant (MDR)       |
| vancomycin        | 1                                             | 4                                               | 8                            | 64                                           | 2                               |
| daptomycin        | 2                                             | 8                                               | 16                           | 4                                            | 2                               |
| oritivancin       | 0.06                                          | 0.5                                             | 1                            | 0.125                                        | 0.06                            |
| compound <b>9</b> | 16                                            | 16                                              | 16                           | 16                                           | 16                              |
